# Supplementary material for: Integrated mRNA and microRNA analysis identifies genes and small miRNA molecules associated with transcriptional and post-transcriptional-level responses to both drought stress and re-watering treatment in tobacco
Source: PubMed Central journal article supplement (PMC5223433; doi:10.1186/s12864-016-3372-0), 2017-01-10

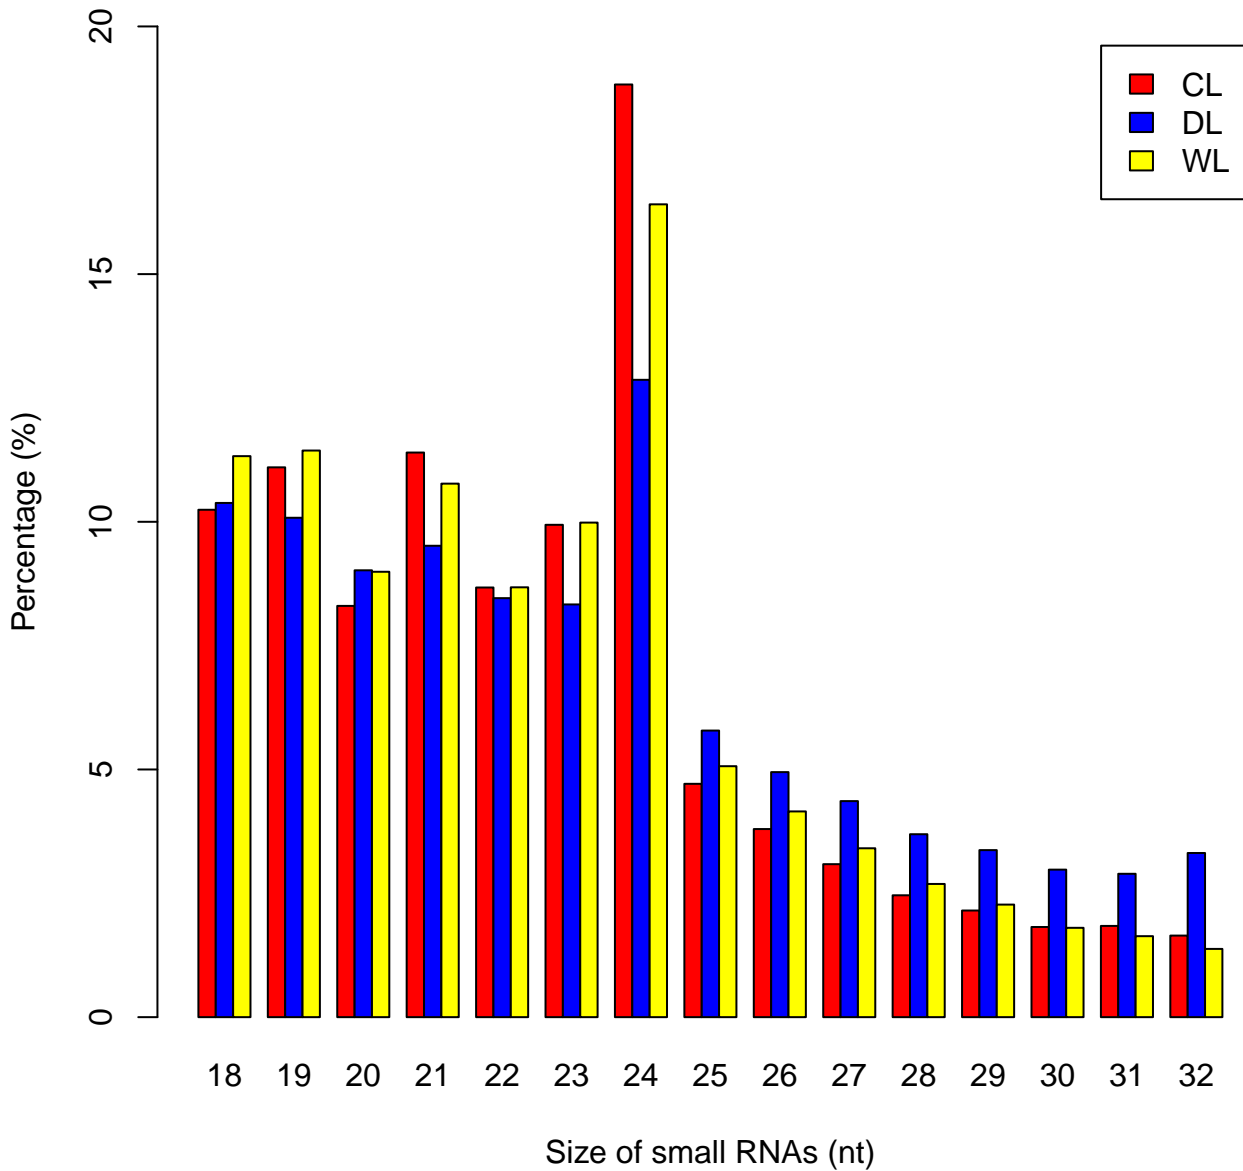

Supplement: 12864_2016_3372_MOESM7_ESM.pdf [file 12864_2016_3372_MOESM7_ESM.pdf]
